# Supplementary material for: Functional and Transcriptional Characterization of Human Embryonic Stem Cell-Derived Endothelial Cells for Treatment of Myocardial Infarction
Source: PubMed Central journal article supplement (PMC2795856; doi:10.1371/journal.pone.0008443), 2009-12-31
Supplement: pone.0008443.s008.pdf [file pone.0008443.s008.pdf]

**Supplemental Table S2A**

**GO Biological Process Categories Overrepresented in hESC vs. EB**

| <b>GO Category</b>                                                      | <b>Genes in Category</b> | <b>% of Genes in Category</b> | <b>Genes in List in Category</b> | <b>% of Genes in List in Category</b> | <b>P-Value</b> |
|-------------------------------------------------------------------------|--------------------------|-------------------------------|----------------------------------|---------------------------------------|----------------|
| GO:6139: nucleobase, nucleoside, nucleotide and nucleic acid metabolism | 5227                     | 25.43                         | 482                              | 37.05                                 | 6.91E-22       |
| GO:278: mitotic cell cycle                                              | 339                      | 1.649                         | 74                               | 5.688                                 | 2.34E-21       |
| GO:7049: cell cycle                                                     | 1151                     | 5.6                           | 158                              | 12.14                                 | 5.44E-21       |
| GO:279: M phase                                                         | 321                      | 1.562                         | 71                               | 5.457                                 | 6.97E-21       |
| GO:7067: mitosis                                                        | 259                      | 1.26                          | 60                               | 4.612                                 | 7.09E-19       |
| GO:87: M phase of mitotic cell cycle                                    | 264                      | 1.284                         | 60                               | 4.612                                 | 1.91E-18       |
| GO:6260: DNA replication                                                | 257                      | 1.25                          | 57                               | 4.381                                 | 4.52E-17       |
| GO:51301: cell division                                                 | 301                      | 1.465                         | 61                               | 4.689                                 | 3.41E-16       |
| GO:6259: DNA metabolism                                                 | 971                      | 4.724                         | 129                              | 9.915                                 | 4.35E-16       |
| GO:6396: RNA processing                                                 | 656                      | 3.192                         | 91                               | 6.995                                 | 1.05E-12       |
| GO:16070: RNA metabolism                                                | 786                      | 3.824                         | 102                              | 7.84                                  | 2.73E-12       |
| GO:6261: DNA-dependent DNA replication                                  | 129                      | 0.628                         | 33                               | 2.537                                 | 2.91E-12       |
| GO:7046: ribosome biogenesis                                            | 102                      | 0.496                         | 29                               | 2.229                                 | 3.49E-12       |
| GO:43283: biopolymer metabolism                                         | 4478                     | 21.79                         | 386                              | 29.67                                 | 3.85E-12       |
| GO:44238: primary metabolism                                            | 11033                    | 53.68                         | 811                              | 62.34                                 | 4.55E-11       |
| GO:50875: cellular physiological process                                | 15952                    | 77.61                         | 1100                             | 84.55                                 | 7.24E-11       |
| GO:6364: rRNA processing                                                | 71                       | 0.345                         | 22                               | 1.691                                 | 2.23E-10       |
| GO:75: cell cycle checkpoint                                            | 55                       | 0.268                         | 19                               | 1.46                                  | 4.65E-10       |
| GO:44237: cellular metabolism                                           | 11473                    | 55.82                         | 832                              | 63.95                                 | 4.67E-10       |
| GO:6270: DNA replication initiation                                     | 29                       | 0.141                         | 14                               | 1.076                                 | 4.88E-10       |
| GO:8152: metabolism                                                     | 12150                    | 59.12                         | 872                              | 67.03                                 | 7.97E-10       |
| GO:16072: rRNA metabolism                                               | 76                       | 0.37                          | 22                               | 1.691                                 | 9.60E-10       |
| GO:6996: organelle organization and biogenesis                          | 1378                     | 6.705                         | 144                              | 11.07                                 | 1.09E-09       |
| GO:74: regulation of progression through cell cycle                     | 732                      | 3.562                         | 89                               | 6.841                                 | 2.03E-09       |
| GO:42254: ribosome biogenesis and assembly                              | 131                      | 0.637                         | 29                               | 2.229                                 | 2.40E-09       |
| GO:7051: spindle organization and biogenesis                            | 25                       | 0.122                         | 12                               | 0.922                                 | 9.46E-09       |
| GO:7028: cytoplasm organization and biogenesis                          | 148                      | 0.72                          | 30                               | 2.306                                 | 1.14E-08       |
| GO:6188: IMP biosynthesis                                               | 8                        | 0.0389                        | 7                                | 0.538                                 | 3.03E-08       |
| GO:6189: 'de novo' IMP biosynthesis                                     | 8                        | 0.0389                        | 7                                | 0.538                                 | 3.03E-08       |
| GO:46040: IMP metabolism                                                | 8                        | 0.0389                        | 7                                | 0.538                                 | 3.03E-08       |
| GO:67: DNA replication and chromosome cycle                             | 19                       | 0.0924                        | 10                               | 0.769                                 | 5.44E-08       |
| GO:7088: regulation of mitosis                                          | 59                       | 0.287                         | 17                               | 1.307                                 | 8.28E-08       |
| GO:46112: nucleobase biosynthesis                                       | 16                       | 0.0778                        | 9                                | 0.692                                 | 1.21E-07       |
| GO:9113: purine base biosynthesis                                       | 9                        | 0.0438                        | 7                                | 0.538                                 | 1.29E-07       |
| GO:46483: heterocycle metabolism                                        | 85                       | 0.414                         | 20                               | 1.537                                 | 2.47E-07       |
| GO:51052: regulation of DNA metabolism                                  | 50                       | 0.243                         | 15                               | 1.153                                 | 2.66E-07       |
| GO:6144: purine base metabolism                                         | 10                       | 0.0487                        | 7                                | 0.538                                 | 4.06E-07       |
| GO:9112: nucleobase metabolism                                          | 18                       | 0.0876                        | 9                                | 0.692                                 | 4.58E-07       |
| GO:6275: regulation of DNA replication                                  | 23                       | 0.112                         | 10                               | 0.769                                 | 5.34E-07       |
| GO:70: mitotic sister chromatid segregation                             | 29                       | 0.141                         | 11                               | 0.846                                 | 7.51E-07       |
| GO:31570: DNA integrity checkpoint                                      | 19                       | 0.0924                        | 9                                | 0.692                                 | 8.21E-07       |
| GO:7093: mitotic checkpoint                                             | 15                       | 0.073                         | 8                                | 0.615                                 | 1.09E-06       |

|                                                                                              |       |        |      |       |          |
|----------------------------------------------------------------------------------------------|-------|--------|------|-------|----------|
| GO:819: sister chromatid segregation                                                         | 30    | 0.146  | 11   | 0.846 | 1.12E-06 |
| GO:7059: chromosome segregation                                                              | 56    | 0.272  | 15   | 1.153 | 1.34E-06 |
| GO:6520: amino acid metabolism                                                               | 348   | 1.693  | 46   | 3.536 | 1.76E-06 |
| GO:43170: macromolecule metabolism                                                           | 6957  | 33.85  | 518  | 39.82 | 1.95E-06 |
| GO:51325: interphase                                                                         | 81    | 0.394  | 18   | 1.384 | 2.37E-06 |
| GO:7017: microtubule-based process                                                           | 241   | 1.173  | 35   | 2.69  | 3.68E-06 |
| GO:7094: mitotic spindle checkpoint                                                          | 6     | 0.0292 | 5    | 0.384 | 5.74E-06 |
| GO:31577: spindle checkpoint                                                                 | 6     | 0.0292 | 5    | 0.384 | 5.74E-06 |
| GO:6974: response to DNA damage stimulus                                                     | 355   | 1.727  | 45   | 3.459 | 6.95E-06 |
| GO:6519: amino acid and derivative metabolism                                                | 411   | 2      | 50   | 3.843 | 7.05E-06 |
| GO:51329: interphase of mitotic cell cycle                                                   | 79    | 0.384  | 17   | 1.307 | 7.14E-06 |
| GO:7582: physiological process                                                               | 17631 | 85.78  | 1167 | 89.7  | 8.62E-06 |
| GO:9987: cellular process                                                                    | 18591 | 90.45  | 1218 | 93.62 | 1.54E-05 |
| GO:6562: proline catabolism                                                                  | 7     | 0.0341 | 5    | 0.384 | 1.90E-05 |
| GO:6400: tRNA modification                                                                   | 7     | 0.0341 | 5    | 0.384 | 1.90E-05 |
| GO:30705: cytoskeleton-dependent intracellular transport                                     | 149   | 0.725  | 24   | 1.845 | 2.16E-05 |
| GO:7018: microtubule-based movement                                                          | 149   | 0.725  | 24   | 1.845 | 2.16E-05 |
| GO:6399: tRNA metabolism                                                                     | 132   | 0.642  | 22   | 1.691 | 2.73E-05 |
| GO:9719: response to endogenous stimulus                                                     | 375   | 1.825  | 45   | 3.459 | 2.80E-05 |
| GO:16043: cell organization and biogenesis                                                   | 2519  | 12.26  | 207  | 15.91 | 3.52E-05 |
| GO:8380: RNA splicing                                                                        | 300   | 1.46   | 38   | 2.921 | 3.56E-05 |
| GO:6397: mRNA processing                                                                     | 379   | 1.844  | 45   | 3.459 | 3.64E-05 |
| GO:7052: mitotic spindle organization and biogenesis                                         | 17    | 0.0827 | 7    | 0.538 | 4.44E-05 |
| GO:6725: aromatic compound metabolism                                                        | 146   | 0.71   | 23   | 1.768 | 4.56E-05 |
| GO:51276: chromosome organization and biogenesis                                             | 506   | 2.462  | 55   | 4.228 | 6.37E-05 |
| GO:6760: folic acid and derivative metabolism                                                | 18    | 0.0876 | 7    | 0.538 | 6.86E-05 |
| GO:1932: regulation of protein amino acid phosphorylation                                    | 24    | 0.117  | 8    | 0.615 | 7.43E-05 |
| GO:85: G2 phase of mitotic cell cycle                                                        | 5     | 0.0243 | 4    | 0.307 | 7.59E-05 |
| GO:51319: G2 phase                                                                           | 5     | 0.0243 | 4    | 0.307 | 7.59E-05 |
| GO:9064: glutamine family amino acid metabolism                                              | 60    | 0.292  | 13   | 0.999 | 7.79E-05 |
| GO:398: nuclear mRNA splicing, via spliceosome                                               | 204   | 0.993  | 28   | 2.152 | 9.22E-05 |
| GO:375: RNA splicing, via transesterification reactions                                      | 204   | 0.993  | 28   | 2.152 | 9.22E-05 |
| GO:377: RNA splicing, via transesterification reactions with bulged adenosine as nucleophile | 204   | 0.993  | 28   | 2.152 | 9.22E-05 |
| GO:9127: purine nucleoside monophosphate biosynthesis                                        | 25    | 0.122  | 8    | 0.615 | 0.000103 |
| GO:9168: purine ribonucleoside monophosphate biosynthesis                                    | 25    | 0.122  | 8    | 0.615 | 0.000103 |
| GO:9126: purine nucleoside monophosphate metabolism                                          | 25    | 0.122  | 8    | 0.615 | 0.000103 |
| GO:9167: purine ribonucleoside monophosphate metabolism                                      | 25    | 0.122  | 8    | 0.615 | 0.000103 |
| GO:9396: folic acid and derivative biosynthesis                                              | 14    | 0.0681 | 6    | 0.461 | 0.000123 |
| GO:6521: regulation of amino acid metabolism                                                 | 26    | 0.127  | 8    | 0.615 | 0.000141 |
| GO:9308: amine metabolism                                                                    | 500   | 2.433  | 53   | 4.074 | 0.000163 |
| GO:6281: DNA repair                                                                          | 312   | 1.518  | 37   | 2.844 | 0.000178 |
| GO:6541: glutamine metabolism                                                                | 21    | 0.102  | 7    | 0.538 | 0.000212 |
| GO:76: DNA replication checkpoint                                                            | 6     | 0.0292 | 4    | 0.307 | 0.000216 |
| GO:6560: proline metabolism                                                                  | 16    | 0.0778 | 6    | 0.461 | 0.000293 |
| GO:16071: mRNA metabolism                                                                    | 427   | 2.078  | 46   | 3.536 | 0.0003   |
| GO:42770: DNA damage response, signal transduction                                           | 29    | 0.141  | 8    | 0.615 | 0.000327 |

|                                                                                        |      |         |     |       |          |
|----------------------------------------------------------------------------------------|------|---------|-----|-------|----------|
| GO:42325: regulation of phosphorylation                                                | 30   | 0.146   | 8   | 0.615 | 0.000421 |
| GO:51244: regulation of cellular physiological process                                 | 5009 | 24.37   | 368 | 28.29 | 0.000454 |
| GO:31497: chromatin assembly                                                           | 149  | 0.725   | 21  | 1.614 | 0.000464 |
| GO:6626: protein targeting to mitochondrion                                            | 31   | 0.151   | 8   | 0.615 | 0.000536 |
| GO:9156: ribonucleoside monophosphate biosynthesis                                     | 32   | 0.156   | 8   | 0.615 | 0.000676 |
| GO:51174: regulation of phosphorus metabolism                                          | 32   | 0.156   | 8   | 0.615 | 0.000676 |
| GO:19220: regulation of phosphate metabolism                                           | 32   | 0.156   | 8   | 0.615 | 0.000676 |
| GO:9161: ribonucleoside monophosphate metabolism                                       | 32   | 0.156   | 8   | 0.615 | 0.000676 |
| GO:6807: nitrogen compound metabolism                                                  | 532  | 2.588   | 53  | 4.074 | 0.000726 |
| GO:19219: regulation of nucleobase, nucleoside, nucleotide and nucleic acid metabolism | 3417 | 16.63   | 259 | 19.91 | 0.000731 |
| GO:6334: nucleosome assembly                                                           | 134  | 0.652   | 19  | 1.46  | 0.000785 |
| GO:7001: chromosome organization and biogenesis (sensu Eukaryota)                      | 485  | 2.36    | 49  | 3.766 | 0.000835 |
| GO:9124: nucleoside monophosphate biosynthesis                                         | 33   | 0.161   | 8   | 0.615 | 0.000843 |
| GO:9123: nucleoside monophosphate metabolism                                           | 33   | 0.161   | 8   | 0.615 | 0.000843 |
| GO:723: telomere maintenance                                                           | 41   | 0.199   | 9   | 0.692 | 0.000879 |
| GO:17038: protein import                                                               | 125  | 0.608   | 18  | 1.384 | 0.000888 |
| GO:6350: transcription                                                                 | 3517 | 17.11   | 265 | 20.37 | 0.000892 |
| GO:6913: nucleocytoplasmic transport                                                   | 203  | 0.988   | 25  | 1.922 | 0.0011   |
| GO:6403: RNA localization                                                              | 98   | 0.477   | 15  | 1.153 | 0.00124  |
| GO:6351: transcription, DNA-dependent                                                  | 3244 | 15.78   | 245 | 18.83 | 0.00128  |
| GO:19752: carboxylic acid metabolism                                                   | 639  | 3.109   | 60  | 4.612 | 0.00145  |
| GO:9451: RNA modification                                                              | 28   | 0.136   | 7   | 0.538 | 0.00146  |
| GO:50791: regulation of physiological process                                          | 5180 | 25.2    | 374 | 28.75 | 0.00147  |
| GO:8033: tRNA processing                                                               | 71   | 0.345   | 12  | 0.922 | 0.00156  |
| GO:6777: Mo-molybdopterin cofactor biosynthesis                                        | 9    | 0.0438  | 4   | 0.307 | 0.00156  |
| GO:6271: DNA strand elongation                                                         | 9    | 0.0438  | 4   | 0.307 | 0.00156  |
| GO:19720: Mo-molybdopterin cofactor metabolism                                         | 9    | 0.0438  | 4   | 0.307 | 0.00156  |
| GO:6082: organic acid metabolism                                                       | 641  | 3.119   | 60  | 4.612 | 0.00156  |
| GO:18193: peptidyl-amino acid modification                                             | 62   | 0.302   | 11  | 0.846 | 0.00161  |
| GO:77: DNA damage checkpoint                                                           | 15   | 0.073   | 5   | 0.384 | 0.00177  |
| GO:30032: lamellipodium biogenesis                                                     | 5    | 0.0243  | 3   | 0.231 | 0.0023   |
| GO:7164: establishment of tissue polarity                                              | 5    | 0.0243  | 3   | 0.231 | 0.0023   |
| GO:8295: spermidine biosynthesis                                                       | 5    | 0.0243  | 3   | 0.231 | 0.0023   |
| GO:9649: entrainment of circadian clock                                                | 5    | 0.0243  | 3   | 0.231 | 0.0023   |
| GO:7010: cytoskeleton organization and biogenesis                                      | 602  | 2.929   | 56  | 4.304 | 0.00252  |
| GO:31323: regulation of cellular metabolism                                            | 3642 | 17.72   | 269 | 20.68 | 0.00254  |
| GO:51327: M phase of meiotic cell cycle                                                | 66   | 0.321   | 11  | 0.846 | 0.0027   |
| GO:7126: meiosis                                                                       | 66   | 0.321   | 11  | 0.846 | 0.0027   |
| GO:51321: meiotic cell cycle                                                           | 66   | 0.321   | 11  | 0.846 | 0.0027   |
| GO:6333: chromatin assembly or disassembly                                             | 221  | 1.075   | 25  | 1.922 | 0.00352  |
| GO:6535: cysteine biosynthesis from serine                                             | 2    | 0.00973 | 2   | 0.154 | 0.004    |
| GO:19343: cysteine biosynthesis via cystathione                                        | 2    | 0.00973 | 2   | 0.154 | 0.004    |
| GO:6597: spermine biosynthesis                                                         | 2    | 0.00973 | 2   | 0.154 | 0.004    |
| GO:8215: spermine metabolism                                                           | 2    | 0.00973 | 2   | 0.154 | 0.004    |
| GO:45817: positive regulation of global transcription from RNA polymerase II promoter  | 2    | 0.00973 | 2   | 0.154 | 0.004    |
| GO:6335: DNA replication-dependent nucleosome assembly                                 | 2    | 0.00973 | 2   | 0.154 | 0.004    |

|                                                                         |      |         |     |       |         |
|-------------------------------------------------------------------------|------|---------|-----|-------|---------|
| GO:46080: dUTP metabolism                                               | 2    | 0.00973 | 2   | 0.154 | 0.004   |
| GO:51169: nuclear transport                                             | 189  | 0.92    | 22  | 1.691 | 0.00424 |
| GO:30879: mammary gland development                                     | 6    | 0.0292  | 3   | 0.231 | 0.00438 |
| GO:8216: spermidine metabolism                                          | 6    | 0.0292  | 3   | 0.231 | 0.00438 |
| GO:6273: lagging strand elongation                                      | 6    | 0.0292  | 3   | 0.231 | 0.00438 |
| GO:6269: DNA replication, synthesis of RNA primer                       | 6    | 0.0292  | 3   | 0.231 | 0.00438 |
| GO:45449: regulation of transcription                                   | 3356 | 16.33   | 247 | 18.99 | 0.00469 |
| GO:6355: regulation of transcription, DNA-dependent                     | 3150 | 15.33   | 233 | 17.91 | 0.00482 |
| GO:6323: DNA packaging                                                  | 427  | 2.078   | 41  | 3.151 | 0.00522 |
| GO:6561: proline biosynthesis                                           | 12   | 0.0584  | 4   | 0.307 | 0.00525 |
| GO:9262: deoxyribonucleotide metabolism                                 | 12   | 0.0584  | 4   | 0.307 | 0.00525 |
| GO:48015: phosphoinositide-mediated signaling                           | 105  | 0.511   | 14  | 1.076 | 0.00639 |
| GO:50794: regulation of cellular process                                | 5371 | 26.13   | 379 | 29.13 | 0.00641 |
| GO:50657: nucleic acid transport                                        | 95   | 0.462   | 13  | 0.999 | 0.00678 |
| GO:50658: RNA transport                                                 | 95   | 0.462   | 13  | 0.999 | 0.00678 |
| GO:51236: establishment of RNA localization                             | 95   | 0.462   | 13  | 0.999 | 0.00678 |
| GO:7004: telomerase-dependent telomere maintenance                      | 20   | 0.0973  | 5   | 0.384 | 0.00703 |
| GO:8625: induction of apoptosis via death domain receptors              | 13   | 0.0633  | 4   | 0.307 | 0.0072  |
| GO:79: regulation of cyclin dependent protein kinase activity           | 55   | 0.268   | 9   | 0.692 | 0.00722 |
| GO:16246: RNA interference                                              | 7    | 0.0341  | 3   | 0.231 | 0.0073  |
| GO:6474: N-terminal protein amino acid acetylation                      | 7    | 0.0341  | 3   | 0.231 | 0.0073  |
| GO:45039: protein import into mitochondrial inner membrane              | 7    | 0.0341  | 3   | 0.231 | 0.0073  |
| GO:8652: amino acid biosynthesis                                        | 75   | 0.365   | 11  | 0.846 | 0.00733 |
| GO:51028: mRNA transport                                                | 75   | 0.365   | 11  | 0.846 | 0.00733 |
| GO:6606: protein import into nucleus                                    | 108  | 0.525   | 14  | 1.076 | 0.00817 |
| GO:15931: nucleobase, nucleoside, nucleotide and nucleic acid transport | 108  | 0.525   | 14  | 1.076 | 0.00817 |
| GO:51170: nuclear import                                                | 108  | 0.525   | 14  | 1.076 | 0.00817 |
| GO:9309: amine biosynthesis                                             | 109  | 0.53    | 14  | 1.076 | 0.00884 |
| GO:44271: nitrogen compound biosynthesis                                | 109  | 0.53    | 14  | 1.076 | 0.00884 |
| GO:6325: establishment and/or maintenance of chromatin architecture     | 415  | 2.019   | 39  | 2.998 | 0.00892 |
| GO:45893: positive regulation of transcription, DNA-dependent           | 143  | 0.696   | 17  | 1.307 | 0.00903 |
| GO:7076: mitotic chromosome condensation                                | 14   | 0.0681  | 4   | 0.307 | 0.00958 |
| GO:40029: regulation of gene expression, epigenetic                     | 78   | 0.38    | 11  | 0.846 | 0.00981 |

**Supplemental Table S2B**

**GO Biological Process Categories Overrepresented in EB vs. hESC**

| GO Category                                                               | Genes in Category | % of Genes in Category | Genes in List in Category | % of Genes in List in Category | P-Value  |
|---------------------------------------------------------------------------|-------------------|------------------------|---------------------------|--------------------------------|----------|
| GO:6817: phosphate transport                                              | 146               | 0.71                   | 41                        | 2.692                          | 4.18E-14 |
| GO:48513: organ development                                               | 907               | 4.413                  | 129                       | 8.47                           | 3.40E-13 |
| GO:50878: regulation of body fluids                                       | 157               | 0.764                  | 40                        | 2.626                          | 2.68E-12 |
| GO:7596: blood coagulation                                                | 132               | 0.642                  | 36                        | 2.364                          | 3.81E-12 |
| GO:50817: coagulation                                                     | 139               | 0.676                  | 37                        | 2.429                          | 4.27E-12 |
| GO:7599: hemostasis                                                       | 140               | 0.681                  | 37                        | 2.429                          | 5.39E-12 |
| GO:42060: wound healing                                                   | 145               | 0.705                  | 37                        | 2.429                          | 1.67E-11 |
| GO:1944: vasculature development                                          | 115               | 0.56                   | 30                        | 1.97                           | 7.62E-10 |
| GO:15698: inorganic anion transport                                       | 229               | 1.114                  | 44                        | 2.889                          | 4.30E-09 |
| GO:48514: blood vessel morphogenesis                                      | 113               | 0.55                   | 28                        | 1.838                          | 9.64E-09 |
| GO:1568: blood vessel development                                         | 113               | 0.55                   | 28                        | 1.838                          | 9.64E-09 |
| GO:1501: skeletal development                                             | 204               | 0.993                  | 40                        | 2.626                          | 1.18E-08 |
| GO:7275: development                                                      | 2960              | 14.4                   | 294                       | 19.3                           | 2.96E-08 |
| GO:6820: anion transport                                                  | 271               | 1.319                  | 47                        | 3.086                          | 3.76E-08 |
| GO:1525: angiogenesis                                                     | 108               | 0.525                  | 26                        | 1.707                          | 6.07E-08 |
| GO:7169: transmembrane receptor protein tyrosine kinase signaling pathway | 228               | 1.109                  | 39                        | 2.561                          | 7.62E-07 |
| GO:48523: negative regulation of cellular process                         | 1122              | 5.459                  | 124                       | 8.142                          | 3.95E-06 |
| GO:48519: negative regulation of biological process                       | 1223              | 5.95                   | 133                       | 8.733                          | 4.02E-06 |
| GO:9887: organ morphogenesis                                              | 310               | 1.508                  | 46                        | 3.02                           | 4.90E-06 |
| GO:7167: enzyme linked receptor protein signaling pathway                 | 310               | 1.508                  | 46                        | 3.02                           | 4.90E-06 |
| GO:9888: tissue development                                               | 263               | 1.28                   | 39                        | 2.561                          | 2.55E-05 |
| GO:50819: negative regulation of coagulation                              | 30                | 0.146                  | 10                        | 0.657                          | 3.68E-05 |
| GO:50818: regulation of coagulation                                       | 30                | 0.146                  | 10                        | 0.657                          | 3.68E-05 |
| GO:9653: morphogenesis                                                    | 940               | 4.574                  | 103                       | 6.763                          | 3.74E-05 |
| GO:43118: negative regulation of physiological process                    | 1056              | 5.138                  | 113                       | 7.42                           | 4.37E-05 |
| GO:9611: response to wounding                                             | 554               | 2.695                  | 67                        | 4.399                          | 4.91E-05 |
| GO:31214: biomineral formation                                            | 58                | 0.282                  | 14                        | 0.919                          | 6.49E-05 |
| GO:1503: ossification                                                     | 58                | 0.282                  | 14                        | 0.919                          | 6.49E-05 |
| GO:7264: small GTPase mediated signal transduction                        | 520               | 2.53                   | 63                        | 4.137                          | 7.75E-05 |
| GO:46849: bone remodeling                                                 | 60                | 0.292                  | 14                        | 0.919                          | 9.65E-05 |
| GO:6508: proteolysis                                                      | 950               | 4.622                  | 101                       | 6.632                          | 0.000141 |
| GO:6888: ER to Golgi transport                                            | 55                | 0.268                  | 13                        | 0.854                          | 0.000148 |
| GO:7154: cell communication                                               | 5496              | 26.74                  | 468                       | 30.73                          | 0.000172 |
| GO:6953: acute-phase response                                             | 36                | 0.175                  | 10                        | 0.657                          | 0.000207 |
| GO:30195: negative regulation of blood coagulation                        | 19                | 0.0924                 | 7                         | 0.46                           | 0.000275 |
| GO:30193: regulation of blood coagulation                                 | 19                | 0.0924                 | 7                         | 0.46                           | 0.000275 |
| GO:8015: circulation                                                      | 171               | 0.832                  | 26                        | 1.707                          | 0.000361 |
| GO:30323: respiratory tube development                                    | 10                | 0.0487                 | 5                         | 0.328                          | 0.000408 |
| GO:51243: negative regulation of cellular physiological process           | 1016              | 4.943                  | 104                       | 6.829                          | 0.000455 |
| GO:16477: cell migration                                                  | 147               | 0.715                  | 23                        | 1.51                           | 0.00051  |
| GO:42730: fibrinolysis                                                    | 16                | 0.0778                 | 6                         | 0.394                          | 0.000686 |

|                                                                             |      |         |     |       |          |
|-----------------------------------------------------------------------------|------|---------|-----|-------|----------|
| GO:8283: cell proliferation                                                 | 810  | 3.941   | 85  | 5.581 | 0.0007   |
| GO:9605: response to external stimulus                                      | 1052 | 5.118   | 106 | 6.96  | 0.000701 |
| GO:30154: cell differentiation                                              | 820  | 3.99    | 85  | 5.581 | 0.00101  |
| GO:51181: cofactor transport                                                | 12   | 0.0584  | 5   | 0.328 | 0.00113  |
| GO:6879: iron ion homeostasis                                               | 38   | 0.185   | 9   | 0.591 | 0.0015   |
| GO:46329: negative regulation of JNK cascade                                | 4    | 0.0195  | 3   | 0.197 | 0.00153  |
| GO:15781: pyrimidine nucleotide-sugar transport                             | 8    | 0.0389  | 4   | 0.263 | 0.00165  |
| GO:50874: organismal physiological process                                  | 2704 | 13.16   | 238 | 15.63 | 0.00207  |
| GO:6040: amino sugar metabolism                                             | 40   | 0.195   | 9   | 0.591 | 0.0022   |
| GO:9968: negative regulation of signal transduction                         | 98   | 0.477   | 16  | 1.051 | 0.0022   |
| GO:46916: transition metal ion homeostasis                                  | 48   | 0.234   | 10  | 0.657 | 0.00236  |
| GO:30324: lung development                                                  | 9    | 0.0438  | 4   | 0.263 | 0.0028   |
| GO:6349: imprinting                                                         | 9    | 0.0438  | 4   | 0.263 | 0.0028   |
| GO:6041: glucosamine metabolism                                             | 34   | 0.165   | 8   | 0.525 | 0.00284  |
| GO:8277: regulation of G-protein coupled receptor protein signaling pathway | 42   | 0.204   | 9   | 0.591 | 0.00314  |
| GO:6030: chitin metabolism                                                  | 15   | 0.073   | 5   | 0.328 | 0.00355  |
| GO:30279: negative regulation of ossification                               | 5    | 0.0243  | 3   | 0.197 | 0.00362  |
| GO:46851: negative regulation of bone remodeling                            | 5    | 0.0243  | 3   | 0.197 | 0.00362  |
| GO:1570: vasculogenesis                                                     | 10   | 0.0487  | 4   | 0.263 | 0.00439  |
| GO:35295: tube development                                                  | 29   | 0.141   | 7   | 0.46  | 0.00443  |
| GO:51180: vitamin transport                                                 | 16   | 0.0778  | 5   | 0.328 | 0.00486  |
| GO:43067: regulation of programmed cell death                               | 476  | 2.316   | 51  | 3.349 | 0.00508  |
| GO:6629: lipid metabolism                                                   | 870  | 4.233   | 85  | 5.581 | 0.00525  |
| GO:51216: cartilage development                                             | 30   | 0.146   | 7   | 0.46  | 0.00542  |
| GO:30100: regulation of endocytosis                                         | 30   | 0.146   | 7   | 0.46  | 0.00542  |
| GO:7155: cell adhesion                                                      | 1002 | 4.875   | 96  | 6.303 | 0.00546  |
| GO:1946: lymphangiogenesis                                                  | 2    | 0.00973 | 2   | 0.131 | 0.00549  |
| GO:7499: ectoderm and mesoderm interaction                                  | 2    | 0.00973 | 2   | 0.131 | 0.00549  |
| GO:48699: neurogenesis                                                      | 2    | 0.00973 | 2   | 0.131 | 0.00549  |
| GO:1945: lymph vessel development                                           | 2    | 0.00973 | 2   | 0.131 | 0.00549  |
| GO:19471: 4-hydroxyproline metabolism                                       | 2    | 0.00973 | 2   | 0.131 | 0.00549  |
| GO:18401: peptidyl-proline hydroxylation to 4-hydroxy-L-proline             | 2    | 0.00973 | 2   | 0.131 | 0.00549  |
| GO:1574: ganglioside biosynthesis                                           | 2    | 0.00973 | 2   | 0.131 | 0.00549  |
| GO:18208: peptidyl-proline modification                                     | 2    | 0.00973 | 2   | 0.131 | 0.00549  |
| GO:19511: peptidyl-proline hydroxylation                                    | 2    | 0.00973 | 2   | 0.131 | 0.00549  |
| GO:15782: CMP-sialic acid transport                                         | 2    | 0.00973 | 2   | 0.131 | 0.00549  |
| GO:15789: UDP-N-acetylgalactosamine transport                               | 2    | 0.00973 | 2   | 0.131 | 0.00549  |
| GO:6907: pinocytosis                                                        | 2    | 0.00973 | 2   | 0.131 | 0.00549  |
| GO:46627: negative regulation of insulin receptor signaling pathway         | 2    | 0.00973 | 2   | 0.131 | 0.00549  |
| GO:7411: axon guidance                                                      | 54   | 0.263   | 10  | 0.657 | 0.00576  |
| GO:7165: signal transduction                                                | 4419 | 21.5    | 367 | 24.1  | 0.00613  |
| GO:8219: cell death                                                         | 840  | 4.087   | 82  | 5.384 | 0.00617  |
| GO:8285: negative regulation of cell proliferation                          | 240  | 1.168   | 29  | 1.904 | 0.00635  |
| GO:6575: amino acid derivative metabolism                                   | 81   | 0.394   | 13  | 0.854 | 0.00636  |
| GO:6662: glycerol ether metabolism                                          | 17   | 0.0827  | 5   | 0.328 | 0.00646  |
| GO:6639: acylglycerol metabolism                                            | 17   | 0.0827  | 5   | 0.328 | 0.00646  |
| GO:6638: neutral lipid metabolism                                           | 17   | 0.0827  | 5   | 0.328 | 0.00646  |

|                                                      |     |        |    |       |         |
|------------------------------------------------------|-----|--------|----|-------|---------|
| GO:46486: glycerolipid metabolism                    | 17  | 0.0827 | 5  | 0.328 | 0.00646 |
| GO:30278: regulation of ossification                 | 11  | 0.0535 | 4  | 0.263 | 0.00649 |
| GO:46850: regulation of bone remodeling              | 11  | 0.0535 | 4  | 0.263 | 0.00649 |
| GO:15674: di-, tri-valent inorganic cation transport | 209 | 1.017  | 26 | 1.707 | 0.0065  |
| GO:6869: lipid transport                             | 119 | 0.579  | 17 | 1.116 | 0.0067  |
| GO:50766: positive regulation of phagocytosis        | 6   | 0.0292 | 3  | 0.197 | 0.00685 |
| GO:50764: regulation of phagocytosis                 | 6   | 0.0292 | 3  | 0.197 | 0.00685 |
| GO:16265: death                                      | 844 | 4.106  | 82 | 5.384 | 0.00694 |
| GO:42127: regulation of cell proliferation           | 439 | 2.136  | 47 | 3.086 | 0.00704 |
| GO:41: transition metal ion transport                | 82  | 0.399  | 13 | 0.854 | 0.00706 |
| GO:6044: N-acetylglucosamine metabolism              | 32  | 0.156  | 7  | 0.46  | 0.00787 |
| GO:9880: embryonic pattern specification             | 18  | 0.0876 | 5  | 0.328 | 0.00841 |
| GO:44255: cellular lipid metabolism                  | 687 | 3.343  | 68 | 4.465 | 0.00884 |
| GO:9628: response to abiotic stimulus                | 617 | 3.002  | 62 | 4.071 | 0.00886 |
| GO:15780: nucleotide-sugar transport                 | 12  | 0.0584 | 4  | 0.263 | 0.00917 |
| GO:42981: regulation of apoptosis                    | 469 | 2.282  | 49 | 3.217 | 0.00941 |

**Supplemental Table S2C**

**GO Biological Process Categories Overrepresented in EB vs. hESC-EC**

| <b>GO Category</b>                                                                     | <b>Genes in Category</b> | <b>% of Genes in Category</b> | <b>Genes in List in Category</b> | <b>% of Genes in List in Category</b> | <b>P-Value</b> |
|----------------------------------------------------------------------------------------|--------------------------|-------------------------------|----------------------------------|---------------------------------------|----------------|
| GO:6355: regulation of transcription, DNA-dependent                                    | 3150                     | 15.33                         | 453                              | 19.92                                 | 2.45E-10       |
| GO:50789: regulation of biological process                                             | 5781                     | 28.13                         | 766                              | 33.69                                 | 4.36E-10       |
| GO:6351: transcription, DNA-dependent                                                  | 3244                     | 15.78                         | 459                              | 20.18                                 | 1.80E-09       |
| GO:19219: regulation of nucleobase, nucleoside, nucleotide and nucleic acid metabolism | 3417                     | 16.63                         | 479                              | 21.06                                 | 2.64E-09       |
| GO:45449: regulation of transcription                                                  | 3356                     | 16.33                         | 471                              | 20.71                                 | 3.21E-09       |
| GO:50794: regulation of cellular process                                               | 5371                     | 26.13                         | 709                              | 31.18                                 | 6.33E-09       |
| GO:50791: regulation of physiological process                                          | 5180                     | 25.2                          | 686                              | 30.17                                 | 7.56E-09       |
| GO:31323: regulation of cellular metabolism                                            | 3642                     | 17.72                         | 500                              | 21.99                                 | 2.03E-08       |
| GO:6350: transcription                                                                 | 3517                     | 17.11                         | 482                              | 21.2                                  | 5.07E-08       |
| GO:51244: regulation of cellular physiological process                                 | 5009                     | 24.37                         | 659                              | 28.98                                 | 5.36E-08       |
| GO:19222: regulation of metabolism                                                     | 3747                     | 18.23                         | 508                              | 22.34                                 | 8.31E-08       |
| GO:6817: phosphate transport                                                           | 146                      | 0.71                          | 37                               | 1.627                                 | 9.71E-07       |
| GO:48513: organ development                                                            | 907                      | 4.413                         | 145                              | 6.376                                 | 2.75E-06       |
| GO:8015: circulation                                                                   | 171                      | 0.832                         | 40                               | 1.759                                 | 3.21E-06       |
| GO:50878: regulation of body fluids                                                    | 157                      | 0.764                         | 36                               | 1.583                                 | 1.56E-05       |
| GO:6139: nucleobase, nucleoside, nucleotide and nucleic acid metabolism                | 5227                     | 25.43                         | 661                              | 29.07                                 | 1.69E-05       |
| GO:7596: blood coagulation                                                             | 132                      | 0.642                         | 31                               | 1.363                                 | 3.62E-05       |
| GO:7599: hemostasis                                                                    | 140                      | 0.681                         | 32                               | 1.407                                 | 4.83E-05       |
| GO:7167: enzyme linked receptor protein signaling pathway                              | 310                      | 1.508                         | 57                               | 2.507                                 | 8.05E-05       |
| GO:7169: transmembrane receptor protein tyrosine kinase signaling pathway              | 228                      | 1.109                         | 45                               | 1.979                                 | 8.11E-05       |
| GO:42060: wound healing                                                                | 145                      | 0.705                         | 32                               | 1.407                                 | 9.86E-05       |
| GO:50817: coagulation                                                                  | 139                      | 0.676                         | 31                               | 1.363                                 | 0.000102       |
| GO:15698: inorganic anion transport                                                    | 229                      | 1.114                         | 44                               | 1.935                                 | 0.000183       |
| GO:1501: skeletal development                                                          | 204                      | 0.993                         | 40                               | 1.759                                 | 0.000226       |
| GO:7275: development                                                                   | 2960                     | 14.4                          | 381                              | 16.75                                 | 0.000482       |
| GO:6930: substrate-bound cell migration, cell extension                                | 5                        | 0.0243                        | 4                                | 0.176                                 | 0.000681       |
| GO:6402: mRNA catabolism                                                               | 36                       | 0.175                         | 11                               | 0.484                                 | 0.00128        |
| GO:184: mRNA catabolism, nonsense-mediated decay                                       | 31                       | 0.151                         | 10                               | 0.44                                  | 0.00134        |
| GO:8286: insulin receptor signaling pathway                                            | 31                       | 0.151                         | 10                               | 0.44                                  | 0.00134        |
| GO:16477: cell migration                                                               | 147                      | 0.715                         | 29                               | 1.275                                 | 0.0014         |
| GO:30324: lung development                                                             | 9                        | 0.0438                        | 5                                | 0.22                                  | 0.00142        |
| GO:51260: protein homo-oligomerization                                                 | 22                       | 0.107                         | 8                                | 0.352                                 | 0.0017         |
| GO:46834: lipid phosphorylation                                                        | 6                        | 0.0292                        | 4                                | 0.176                                 | 0.00186        |
| GO:46854: phosphoinositide phosphorylation                                             | 6                        | 0.0292                        | 4                                | 0.176                                 | 0.00186        |
| GO:46928: regulation of neurotransmitter secretion                                     | 6                        | 0.0292                        | 4                                | 0.176                                 | 0.00186        |
| GO:7155: cell adhesion                                                                 | 1002                     | 4.875                         | 140                              | 6.157                                 | 0.00203        |
| GO:48731: system development                                                           | 739                      | 3.596                         | 107                              | 4.705                                 | 0.00214        |
| GO:7399: nervous system development                                                    | 735                      | 3.576                         | 106                              | 4.661                                 | 0.00254        |
| GO:30323: respiratory tube development                                                 | 10                       | 0.0487                        | 5                                | 0.22                                  | 0.00258        |
| GO:30195: negative regulation of blood coagulation                                     | 19                       | 0.0924                        | 7                                | 0.308                                 | 0.00304        |
| GO:30193: regulation of blood coagulation                                              | 19                       | 0.0924                        | 7                                | 0.308                                 | 0.00304        |



|                                                                  |      |        |     |       |         |
|------------------------------------------------------------------|------|--------|-----|-------|---------|
| GO:31214: biomineral formation                                   | 58   | 0.282  | 14  | 0.616 | 0.00364 |
| GO:1503: ossification                                            | 58   | 0.282  | 14  | 0.616 | 0.00364 |
| GO:30902: hindbrain development                                  | 7    | 0.0341 | 4   | 0.176 | 0.00397 |
| GO:50819: negative regulation of coagulation                     | 30   | 0.146  | 9   | 0.396 | 0.00401 |
| GO:50818: regulation of coagulation                              | 30   | 0.146  | 9   | 0.396 | 0.00401 |
| GO:30048: actin filament-based movement                          | 20   | 0.0973 | 7   | 0.308 | 0.00423 |
| GO:30278: regulation of ossification                             | 11   | 0.0535 | 5   | 0.22  | 0.00429 |
| GO:46850: regulation of bone remodeling                          | 11   | 0.0535 | 5   | 0.22  | 0.00429 |
| GO:48523: negative regulation of cellular process                | 1122 | 5.459  | 152 | 6.684 | 0.00446 |
| GO:48519: negative regulation of biological process              | 1223 | 5.95   | 164 | 7.212 | 0.00479 |
| GO:30147: natriuresis                                            | 4    | 0.0195 | 3   | 0.132 | 0.00496 |
| GO:30146: diuresis                                               | 4    | 0.0195 | 3   | 0.132 | 0.00496 |
| GO:46849: bone remodeling                                        | 60   | 0.292  | 14  | 0.616 | 0.00505 |
| GO:6869: lipid transport                                         | 119  | 0.579  | 23  | 1.011 | 0.00538 |
| GO:42730: fibrinolysis                                           | 16   | 0.0778 | 6   | 0.264 | 0.00546 |
| GO:1508: regulation of action potential                          | 16   | 0.0778 | 6   | 0.264 | 0.00546 |
| GO:6820: anion transport                                         | 271  | 1.319  | 44  | 1.935 | 0.00598 |
| GO:19884: antigen presentation, exogenous antigen                | 32   | 0.156  | 9   | 0.396 | 0.00642 |
| GO:6928: cell motility                                           | 356  | 1.732  | 55  | 2.419 | 0.00669 |
| GO:51674: localization of cell                                   | 356  | 1.732  | 55  | 2.419 | 0.00669 |
| GO:40011: locomotion                                             | 356  | 1.732  | 55  | 2.419 | 0.00669 |
| GO:51181: cofactor transport                                     | 12   | 0.0584 | 5   | 0.22  | 0.0067  |
| GO:6909: phagocytosis                                            | 38   | 0.185  | 10  | 0.44  | 0.00693 |
| GO:6929: substrate-bound cell migration                          | 8    | 0.0389 | 4   | 0.176 | 0.00724 |
| GO:43118: negative regulation of physiological process           | 1056 | 5.138  | 142 | 6.245 | 0.00757 |
| GO:7588: excretion                                               | 64   | 0.311  | 14  | 0.616 | 0.00917 |
| GO:50954: sensory perception of mechanical stimulus              | 174  | 0.847  | 30  | 1.319 | 0.00917 |
| GO:7605: sensory perception of sound                             | 174  | 0.847  | 30  | 1.319 | 0.00917 |
| GO:6939: smooth muscle contraction                               | 34   | 0.165  | 9   | 0.396 | 0.00981 |
| GO:19886: antigen processing, exogenous antigen via MHC class II | 34   | 0.165  | 9   | 0.396 | 0.00981 |
| GO:16525: negative regulation of angiogenesis                    | 13   | 0.0633 | 5   | 0.22  | 0.0099  |

**Supplemental Table S2D**

**GO Biological Process Categories Overrepresented in hESC-EC vs. EB**

| GO Category                                                                       | Genes in Category | % of Genes in Category | Genes in List in Category | % of Genes in List in Category | P-Value  |
|-----------------------------------------------------------------------------------|-------------------|------------------------|---------------------------|--------------------------------|----------|
| GO:48522: positive regulation of cellular process                                 | 815               | 3.965                  | 154                       | 6.121                          | 1.72E-08 |
| GO:7243: protein kinase cascade                                                   | 482               | 2.345                  | 101                       | 4.014                          | 3.23E-08 |
| GO:48518: positive regulation of biological process                               | 975               | 4.744                  | 175                       | 6.955                          | 8.00E-08 |
| GO:6915: apoptosis                                                                | 790               | 3.844                  | 147                       | 5.843                          | 9.83E-08 |
| GO:6917: induction of apoptosis                                                   | 213               | 1.036                  | 54                        | 2.146                          | 1.10E-07 |
| GO:12502: induction of programmed cell death                                      | 214               | 1.041                  | 54                        | 2.146                          | 1.29E-07 |
| GO:12501: programmed cell death                                                   | 796               | 3.873                  | 147                       | 5.843                          | 1.58E-07 |
| GO:42981: regulation of apoptosis                                                 | 469               | 2.282                  | 96                        | 3.816                          | 2.23E-07 |
| GO:43065: positive regulation of apoptosis                                        | 235               | 1.143                  | 57                        | 2.266                          | 2.48E-07 |
| GO:43068: positive regulation of programmed cell death                            | 238               | 1.158                  | 57                        | 2.266                          | 3.89E-07 |
| GO:43067: regulation of programmed cell death                                     | 476               | 2.316                  | 96                        | 3.816                          | 4.54E-07 |
| GO:16265: death                                                                   | 844               | 4.106                  | 152                       | 6.041                          | 4.73E-07 |
| GO:7249: I-kappaB kinase/NF-kappaB cascade                                        | 200               | 0.973                  | 50                        | 1.987                          | 5.04E-07 |
| GO:8219: cell death                                                               | 840               | 4.087                  | 151                       | 6.002                          | 5.78E-07 |
| GO:43123: positive regulation of I-kappaB kinase/NF-kappaB cascade                | 150               | 0.73                   | 40                        | 1.59                           | 1.18E-06 |
| GO:43122: regulation of I-kappaB kinase/NF-kappaB cascade                         | 158               | 0.769                  | 41                        | 1.63                           | 1.88E-06 |
| GO:16043: cell organization and biogenesis                                        | 2519              | 12.26                  | 380                       | 15.1                           | 3.35E-06 |
| GO:30029: actin filament-based process                                            | 246               | 1.197                  | 55                        | 2.186                          | 5.87E-06 |
| GO:74: regulation of progression through cell cycle                               | 732               | 3.562                  | 130                       | 5.167                          | 6.62E-06 |
| GO:51242: positive regulation of cellular physiological process                   | 653               | 3.177                  | 118                       | 4.69                           | 7.70E-06 |
| GO:7049: cell cycle                                                               | 1151              | 5.6                    | 188                       | 7.472                          | 1.63E-05 |
| GO:8632: apoptotic program                                                        | 95                | 0.462                  | 27                        | 1.073                          | 1.78E-05 |
| GO:9967: positive regulation of signal transduction                               | 172               | 0.837                  | 41                        | 1.63                           | 1.78E-05 |
| GO:43119: positive regulation of physiological process                            | 681               | 3.313                  | 120                       | 4.769                          | 2.14E-05 |
| GO:7010: cytoskeleton organization and biogenesis                                 | 602               | 2.929                  | 108                       | 4.293                          | 2.53E-05 |
| GO:7046: ribosome biogenesis                                                      | 102               | 0.496                  | 28                        | 1.113                          | 2.54E-05 |
| GO:30036: actin cytoskeleton organization and biogenesis                          | 229               | 1.114                  | 50                        | 1.987                          | 2.97E-05 |
| GO:8624: induction of apoptosis by extracellular signals                          | 45                | 0.219                  | 16                        | 0.636                          | 4.74E-05 |
| GO:9451: RNA modification                                                         | 28                | 0.136                  | 12                        | 0.477                          | 5.04E-05 |
| GO:7242: intracellular signaling cascade                                          | 1818              | 8.845                  | 275                       | 10.93                          | 7.41E-05 |
| GO:7178: transmembrane receptor protein serine/threonine kinase signaling pathway | 64                | 0.311                  | 19                        | 0.755                          | 0.00016  |
| GO:48519: negative regulation of biological process                               | 1223              | 5.95                   | 191                       | 7.591                          | 0.000187 |
| GO:48523: negative regulation of cellular process                                 | 1122              | 5.459                  | 177                       | 7.035                          | 0.000191 |
| GO:45210: FasL biosynthesis                                                       | 4                 | 0.0195                 | 4                         | 0.159                          | 0.000224 |
| GO:6858: extracellular transport                                                  | 4                 | 0.0195                 | 4                         | 0.159                          | 0.000224 |
| GO:6364: rRNA processing                                                          | 71                | 0.345                  | 20                        | 0.795                          | 0.000239 |
| GO:9605: response to external stimulus                                            | 1052              | 5.118                  | 166                       | 6.598                          | 0.000297 |
| GO:43085: positive regulation of enzyme activity                                  | 170               | 0.827                  | 37                        | 1.471                          | 0.000324 |
| GO:8283: cell proliferation                                                       | 810               | 3.941                  | 132                       | 5.246                          | 0.000324 |
| GO:6919: caspase activation                                                       | 52                | 0.253                  | 16                        | 0.636                          | 0.000329 |
| GO:43280: positive regulation of caspase activity                                 | 52                | 0.253                  | 16                        | 0.636                          | 0.000329 |

|                                                                     |      |        |     |       |          |
|---------------------------------------------------------------------|------|--------|-----|-------|----------|
| GO:43281: regulation of caspase activity                            | 52   | 0.253  | 16  | 0.636 | 0.000329 |
| GO:16192: vesicle-mediated transport                                | 580  | 2.822  | 99  | 3.935 | 0.000357 |
| GO:8625: induction of apoptosis via death domain receptors          | 13   | 0.0633 | 7   | 0.278 | 0.000357 |
| GO:51338: regulation of transferase activity                        | 197  | 0.958  | 41  | 1.63  | 0.000429 |
| GO:45859: regulation of protein kinase activity                     | 191  | 0.929  | 40  | 1.59  | 0.000439 |
| GO:7595: lactation                                                  | 10   | 0.0487 | 6   | 0.238 | 0.000452 |
| GO:154: rRNA modification                                           | 7    | 0.0341 | 5   | 0.199 | 0.000464 |
| GO:6636: fatty acid desaturation                                    | 7    | 0.0341 | 5   | 0.199 | 0.000464 |
| GO:51345: positive regulation of hydrolase activity                 | 54   | 0.263  | 16  | 0.636 | 0.000528 |
| GO:44260: cellular macromolecule metabolism                         | 5196 | 25.28  | 703 | 27.94 | 0.000629 |
| GO:16072: rRNA metabolism                                           | 76   | 0.37   | 20  | 0.795 | 0.000633 |
| GO:19538: protein metabolism                                        | 5170 | 25.15  | 699 | 27.78 | 0.000709 |
| GO:6626: protein targeting to mitochondrion                         | 31   | 0.151  | 11  | 0.437 | 0.000734 |
| GO:7015: actin filament organization                                | 46   | 0.224  | 14  | 0.556 | 0.000862 |
| GO:45860: positive regulation of protein kinase activity            | 78   | 0.38   | 20  | 0.795 | 0.000904 |
| GO:51258: protein polymerization                                    | 62   | 0.302  | 17  | 0.676 | 0.000956 |
| GO:51347: positive regulation of transferase activity               | 84   | 0.409  | 21  | 0.835 | 0.000971 |
| GO:7162: negative regulation of cell adhesion                       | 23   | 0.112  | 9   | 0.358 | 0.000992 |
| GO:42254: ribosome biogenesis and assembly                          | 131  | 0.637  | 29  | 1.153 | 0.00103  |
| GO:50790: regulation of enzyme activity                             | 377  | 1.834  | 67  | 2.663 | 0.00105  |
| GO:44267: cellular protein metabolism                               | 5126 | 24.94  | 691 | 27.46 | 0.00106  |
| GO:6099: tricarboxylic acid cycle                                   | 37   | 0.18   | 12  | 0.477 | 0.00107  |
| GO:8637: apoptotic mitochondrial changes                            | 19   | 0.0924 | 8   | 0.318 | 0.00108  |
| GO:6996: organelle organization and biogenesis                      | 1378 | 6.705  | 206 | 8.188 | 0.00111  |
| GO:51649: establishment of cellular localization                    | 1034 | 5.031  | 159 | 6.32  | 0.00125  |
| GO:9966: regulation of signal transduction                          | 442  | 2.151  | 76  | 3.021 | 0.00132  |
| GO:7165: signal transduction                                        | 4419 | 21.5   | 600 | 23.85 | 0.00133  |
| GO:46356: acetyl-CoA catabolism                                     | 38   | 0.185  | 12  | 0.477 | 0.00139  |
| GO:7264: small GTPase mediated signal transduction                  | 520  | 2.53   | 87  | 3.458 | 0.00146  |
| GO:15031: protein transport                                         | 1009 | 4.909  | 155 | 6.161 | 0.0015   |
| GO:51641: cellular localization                                     | 1047 | 5.094  | 160 | 6.359 | 0.00158  |
| GO:46907: intracellular transport                                   | 1025 | 4.987  | 157 | 6.24  | 0.00158  |
| GO:9615: response to virus                                          | 82   | 0.399  | 20  | 0.795 | 0.00175  |
| GO:7179: transforming growth factor beta receptor signaling pathway | 44   | 0.214  | 13  | 0.517 | 0.00177  |
| GO:19509: methionine salvage                                        | 3    | 0.0146 | 3   | 0.119 | 0.00183  |
| GO:43102: amino acid salvage                                        | 3    | 0.0146 | 3   | 0.119 | 0.00183  |
| GO:18345: protein palmitoylation                                    | 3    | 0.0146 | 3   | 0.119 | 0.00183  |
| GO:43405: regulation of MAPK activity                               | 83   | 0.404  | 20  | 0.795 | 0.00205  |
| GO:187: activation of MAPK activity                                 | 45   | 0.219  | 13  | 0.517 | 0.00221  |
| GO:7154: cell communication                                         | 5496 | 26.74  | 732 | 29.09 | 0.00252  |
| GO:1525: angiogenesis                                               | 108  | 0.525  | 24  | 0.954 | 0.00253  |
| GO:42060: wound healing                                             | 145  | 0.705  | 30  | 1.192 | 0.0026   |
| GO:902: cellular morphogenesis                                      | 453  | 2.204  | 76  | 3.021 | 0.0026   |
| GO:45786: negative regulation of progression through cell cycle     | 255  | 1.241  | 47  | 1.868 | 0.00263  |
| GO:50654: chondroitin sulfate proteoglycan metabolism               | 13   | 0.0633 | 6   | 0.238 | 0.00266  |
| GO:30166: proteoglycan biosynthesis                                 | 26   | 0.127  | 9   | 0.358 | 0.00269  |
| GO:6893: Golgi to plasma membrane transport                         | 6    | 0.0292 | 4   | 0.159 | 0.00274  |

|                                                                 |      |        |     |       |         |
|-----------------------------------------------------------------|------|--------|-----|-------|---------|
| GO:9408: response to heat                                       | 6    | 0.0292 | 4   | 0.159 | 0.00274 |
| GO:43406: positive regulation of MAPK activity                  | 46   | 0.224  | 13  | 0.517 | 0.00274 |
| GO:9109: coenzyme catabolism                                    | 41   | 0.199  | 12  | 0.477 | 0.00286 |
| GO:8361: regulation of cell size                                | 245  | 1.192  | 45  | 1.789 | 0.00342 |
| GO:16049: cell growth                                           | 245  | 1.192  | 45  | 1.789 | 0.00342 |
| GO:7028: cytoplasm organization and biogenesis                  | 148  | 0.72   | 30  | 1.192 | 0.00358 |
| GO:8104: protein localization                                   | 1076 | 5.235  | 161 | 6.399 | 0.00362 |
| GO:9396: folic acid and derivative biosynthesis                 | 14   | 0.0681 | 6   | 0.238 | 0.00418 |
| GO:6897: endocytosis                                            | 248  | 1.207  | 45  | 1.789 | 0.00432 |
| GO:9058: biosynthesis                                           | 1974 | 9.604  | 279 | 11.09 | 0.0044  |
| GO:51243: negative regulation of cellular physiological process | 1016 | 4.943  | 152 | 6.041 | 0.00464 |
| GO:48514: blood vessel morphogenesis                            | 113  | 0.55   | 24  | 0.954 | 0.00468 |
| GO:1568: blood vessel development                               | 113  | 0.55   | 24  | 0.954 | 0.00468 |
| GO:6399: tRNA metabolism                                        | 132  | 0.642  | 27  | 1.073 | 0.00485 |
| GO:6937: regulation of muscle contraction                       | 49   | 0.238  | 13  | 0.517 | 0.00498 |
| GO:30148: sphingolipid biosynthesis                             | 19   | 0.0924 | 7   | 0.278 | 0.00539 |
| GO:9266: response to temperature stimulus                       | 19   | 0.0924 | 7   | 0.278 | 0.00539 |
| GO:6790: sulfur metabolism                                      | 102  | 0.496  | 22  | 0.874 | 0.00544 |
| GO:9186: deoxyribonucleoside diphosphate metabolism             | 7    | 0.0341 | 4   | 0.159 | 0.00577 |
| GO:1944: vasculature development                                | 115  | 0.56   | 24  | 0.954 | 0.00589 |
| GO:45184: establishment of protein localization                 | 1045 | 5.084  | 155 | 6.161 | 0.00589 |
| GO:6914: autophagy                                              | 34   | 0.165  | 10  | 0.397 | 0.00604 |
| GO:9247: glycolipid biosynthesis                                | 15   | 0.073  | 6   | 0.238 | 0.00626 |
| GO:6633: fatty acid biosynthesis                                | 79   | 0.384  | 18  | 0.715 | 0.00628 |
| GO:44272: sulfur compound biosynthesis                          | 56   | 0.272  | 14  | 0.556 | 0.00645 |
| GO:51187: cofactor catabolism                                   | 45   | 0.219  | 12  | 0.477 | 0.00656 |
| GO:9060: aerobic respiration                                    | 45   | 0.219  | 12  | 0.477 | 0.00656 |
| GO:6944: membrane fusion                                        | 45   | 0.219  | 12  | 0.477 | 0.00656 |
| GO:43118: negative regulation of physiological process          | 1056 | 5.138  | 156 | 6.2   | 0.00666 |
| GO:50650: chondroitin sulfate proteoglycan biosynthesis         | 11   | 0.0535 | 5   | 0.199 | 0.00668 |
| GO:43037: translation                                           | 289  | 1.406  | 50  | 1.987 | 0.00715 |
| GO:8610: lipid biosynthesis                                     | 319  | 1.552  | 54  | 2.146 | 0.00831 |
| GO:42157: lipoprotein metabolism                                | 94   | 0.457  | 20  | 0.795 | 0.0091  |
| GO:6084: acetyl-CoA metabolism                                  | 47   | 0.229  | 12  | 0.477 | 0.00946 |
| GO:8037: cell recognition                                       | 31   | 0.151  | 9   | 0.358 | 0.00988 |

**Supplemental Table S2E**

**GO Biological Process Categories Overrepresented in hESC-EC vs. HUVEC**

| <b>GO Category</b>                                                                             | <b>Genes in Category</b> | <b>% of Genes in Category</b> | <b>Genes in List in Category</b> | <b>% of Genes in List in Category</b> | <b>P-Value</b> |
|------------------------------------------------------------------------------------------------|--------------------------|-------------------------------|----------------------------------|---------------------------------------|----------------|
| GO:7275: development                                                                           | 2960                     | 14.4                          | 317                              | 22.64                                 | 7.05E-18       |
| GO:48513: organ development                                                                    | 907                      | 4.413                         | 125                              | 8.929                                 | 1.93E-14       |
| GO:1501: skeletal development                                                                  | 204                      | 0.993                         | 42                               | 3                                     | 8.43E-11       |
| GO:6817: phosphate transport                                                                   | 146                      | 0.71                          | 33                               | 2.357                                 | 7.08E-10       |
| GO:7154: cell communication                                                                    | 5496                     | 26.74                         | 470                              | 33.57                                 | 2.86E-09       |
| GO:7155: cell adhesion                                                                         | 1002                     | 4.875                         | 116                              | 8.286                                 | 1.03E-08       |
| GO:9653: morphogenesis                                                                         | 940                      | 4.574                         | 110                              | 7.857                                 | 1.42E-08       |
| GO:50874: organismal physiological process                                                     | 2704                     | 13.16                         | 252                              | 18                                    | 6.00E-08       |
| GO:7399: nervous system development                                                            | 735                      | 3.576                         | 89                               | 6.357                                 | 7.74E-08       |
| GO:48731: system development                                                                   | 739                      | 3.596                         | 89                               | 6.357                                 | 9.91E-08       |
| GO:42445: hormone metabolism                                                                   | 70                       | 0.341                         | 17                               | 1.214                                 | 3.29E-06       |
| GO:6334: nucleosome assembly                                                                   | 134                      | 0.652                         | 25                               | 1.786                                 | 3.59E-06       |
| GO:8015: circulation                                                                           | 171                      | 0.832                         | 29                               | 2.071                                 | 4.58E-06       |
| GO:6349: imprinting                                                                            | 9                        | 0.0438                        | 6                                | 0.429                                 | 6.94E-06       |
| GO:51239: regulation of organismal physiological process                                       | 193                      | 0.939                         | 31                               | 2.214                                 | 6.94E-06       |
| GO:6936: muscle contraction                                                                    | 232                      | 1.129                         | 35                               | 2.5                                   | 7.72E-06       |
| GO:31497: chromatin assembly                                                                   | 149                      | 0.725                         | 26                               | 1.857                                 | 8.27E-06       |
| GO:7169: transmembrane receptor protein tyrosine kinase signaling pathway                      | 228                      | 1.109                         | 34                               | 2.429                                 | 1.33E-05       |
| GO:9887: organ morphogenesis                                                                   | 310                      | 1.508                         | 42                               | 3                                     | 1.57E-05       |
| GO:51056: regulation of small GTPase mediated signal transduction                              | 94                       | 0.457                         | 19                               | 1.357                                 | 1.59E-05       |
| GO:6750: glutathione biosynthesis                                                              | 19                       | 0.0924                        | 8                                | 0.571                                 | 1.74E-05       |
| GO:9605: response to external stimulus                                                         | 1052                     | 5.118                         | 107                              | 7.643                                 | 1.79E-05       |
| GO:48010: vascular endothelial growth factor receptor signaling pathway                        | 4                        | 0.0195                        | 4                                | 0.286                                 | 2.14E-05       |
| GO:30947: regulation of vascular endothelial growth factor receptor signaling pathway          | 4                        | 0.0195                        | 4                                | 0.286                                 | 2.14E-05       |
| GO:30949: positive regulation of vascular endothelial growth factor receptor signaling pathway | 4                        | 0.0195                        | 4                                | 0.286                                 | 2.14E-05       |
| GO:51241: negative regulation of organismal physiological process                              | 32                       | 0.156                         | 10                               | 0.714                                 | 3.36E-05       |
| GO:7167: enzyme linked receptor protein signaling pathway                                      | 310                      | 1.508                         | 41                               | 2.929                                 | 3.47E-05       |
| GO:15698: inorganic anion transport                                                            | 229                      | 1.114                         | 33                               | 2.357                                 | 3.60E-05       |
| GO:16055: Wnt receptor signaling pathway                                                       | 162                      | 0.788                         | 26                               | 1.857                                 | 3.76E-05       |
| GO:35023: regulation of Rho protein signal transduction                                        | 46                       | 0.224                         | 12                               | 0.857                                 | 4.22E-05       |
| GO:6954: inflammatory response                                                                 | 294                      | 1.43                          | 39                               | 2.786                                 | 4.99E-05       |
| GO:43062: extracellular structure organization and biogenesis                                  | 78                       | 0.38                          | 16                               | 1.143                                 | 6.04E-05       |
| GO:30198: extracellular matrix organization and biogenesis                                     | 78                       | 0.38                          | 16                               | 1.143                                 | 6.04E-05       |
| GO:50918: positive chemotaxis                                                                  | 8                        | 0.0389                        | 5                                | 0.357                                 | 6.85E-05       |
| GO:50926: regulation of positive chemotaxis                                                    | 8                        | 0.0389                        | 5                                | 0.357                                 | 6.85E-05       |
| GO:50927: positive regulation of positive chemotaxis                                           | 8                        | 0.0389                        | 5                                | 0.357                                 | 6.85E-05       |
| GO:50930: induction of positive chemotaxis                                                     | 8                        | 0.0389                        | 5                                | 0.357                                 | 6.85E-05       |
| GO:44272: sulfur compound biosynthesis                                                         | 56                       | 0.272                         | 13                               | 0.929                                 | 7.69E-05       |
| GO:9611: response to wounding                                                                  | 554                      | 2.695                         | 62                               | 4.429                                 | 7.95E-05       |
| GO:6749: glutathione metabolism                                                                | 23                       | 0.112                         | 8                                | 0.571                                 | 8.83E-05       |
| GO:16051: carbohydrate biosynthesis                                                            | 115                      | 0.56                          | 20                               | 1.429                                 | 9.24E-05       |

|                                                                  |     |        |    |       |          |
|------------------------------------------------------------------|-----|--------|----|-------|----------|
| GO:9308: amine metabolism                                        | 500 | 2.433  | 57 | 4.071 | 9.27E-05 |
| GO:6820: anion transport                                         | 271 | 1.319  | 36 | 2.571 | 9.28E-05 |
| GO:30279: negative regulation of ossification                    | 5   | 0.0243 | 4  | 0.286 | 0.000101 |
| GO:46851: negative regulation of bone remodeling                 | 5   | 0.0243 | 4  | 0.286 | 0.000101 |
| GO:6953: acute-phase response                                    | 36  | 0.175  | 10 | 0.714 | 0.000103 |
| GO:42446: hormone biosynthesis                                   | 43  | 0.209  | 11 | 0.786 | 0.000106 |
| GO:31214: biomineral formation                                   | 58  | 0.282  | 13 | 0.929 | 0.000113 |
| GO:1503: ossification                                            | 58  | 0.282  | 13 | 0.929 | 0.000113 |
| GO:9309: amine biosynthesis                                      | 109 | 0.53   | 19 | 1.357 | 0.000133 |
| GO:44271: nitrogen compound biosynthesis                         | 109 | 0.53   | 19 | 1.357 | 0.000133 |
| GO:7517: muscle development                                      | 255 | 1.241  | 34 | 2.429 | 0.000133 |
| GO:50920: regulation of chemotaxis                               | 9   | 0.0438 | 5  | 0.357 | 0.000145 |
| GO:50921: positive regulation of chemotaxis                      | 9   | 0.0438 | 5  | 0.357 | 0.000145 |
| GO:9966: regulation of signal transduction                       | 442 | 2.151  | 51 | 3.643 | 0.000158 |
| GO:46849: bone remodeling                                        | 60  | 0.292  | 13 | 0.929 | 0.000163 |
| GO:6790: sulfur metabolism                                       | 102 | 0.496  | 18 | 1.286 | 0.000168 |
| GO:6519: amino acid and derivative metabolism                    | 411 | 2      | 48 | 3.429 | 0.000183 |
| GO:45807: positive regulation of endocytosis                     | 14  | 0.0681 | 6  | 0.429 | 0.000184 |
| GO:7417: central nervous system development                      | 169 | 0.822  | 25 | 1.786 | 0.000201 |
| GO:6807: nitrogen compound metabolism                            | 532 | 2.588  | 58 | 4.143 | 0.000266 |
| GO:1944: vasculature development                                 | 115 | 0.56   | 19 | 1.357 | 0.000273 |
| GO:7267: cell-cell signaling                                     | 750 | 3.649  | 76 | 5.429 | 0.000327 |
| GO:19886: antigen processing, exogenous antigen via MHC class II | 34  | 0.165  | 9  | 0.643 | 0.00034  |
| GO:1525: angiogenesis                                            | 108 | 0.525  | 18 | 1.286 | 0.000351 |
| GO:6937: regulation of muscle contraction                        | 49  | 0.238  | 11 | 0.786 | 0.00037  |
| GO:16337: cell-cell adhesion                                     | 302 | 1.469  | 37 | 2.643 | 0.000386 |
| GO:30278: regulation of ossification                             | 11  | 0.0535 | 5  | 0.357 | 0.000475 |
| GO:46850: regulation of bone remodeling                          | 11  | 0.0535 | 5  | 0.357 | 0.000475 |
| GO:7156: homophilic cell adhesion                                | 181 | 0.881  | 25 | 1.786 | 0.000579 |
| GO:48514: blood vessel morphogenesis                             | 113 | 0.55   | 18 | 1.286 | 0.000615 |
| GO:1568: blood vessel development                                | 113 | 0.55   | 18 | 1.286 | 0.000615 |
| GO:6730: one-carbon compound metabolism                          | 60  | 0.292  | 12 | 0.857 | 0.000626 |
| GO:42553: cellular nerve ensheathment                            | 7   | 0.0341 | 4  | 0.286 | 0.000635 |
| GO:7272: ionic insulation of neurons by glial cells              | 7   | 0.0341 | 4  | 0.286 | 0.000635 |
| GO:42552: myelination                                            | 7   | 0.0341 | 4  | 0.286 | 0.000635 |
| GO:30104: water homeostasis                                      | 7   | 0.0341 | 4  | 0.286 | 0.000635 |
| GO:30154: cell differentiation                                   | 820 | 3.99   | 80 | 5.714 | 0.000728 |
| GO:8286: insulin receptor signaling pathway                      | 31  | 0.151  | 8  | 0.571 | 0.000871 |
| GO:6575: amino acid derivative metabolism                        | 81  | 0.394  | 14 | 1     | 0.00106  |
| GO:19884: antigen presentation, exogenous antigen                | 32  | 0.156  | 8  | 0.571 | 0.00109  |
| GO:30502: negative regulation of bone mineralization             | 4   | 0.0195 | 3  | 0.214 | 0.0012   |
| GO:45210: FasL biosynthesis                                      | 4   | 0.0195 | 3  | 0.214 | 0.0012   |
| GO:6883: sodium ion homeostasis                                  | 4   | 0.0195 | 3  | 0.214 | 0.0012   |
| GO:8652: amino acid biosynthesis                                 | 75  | 0.365  | 13 | 0.929 | 0.00154  |
| GO:15669: gas transport                                          | 35  | 0.17   | 8  | 0.571 | 0.00204  |
| GO:15671: oxygen transport                                       | 35  | 0.17   | 8  | 0.571 | 0.00204  |
| GO:9888: tissue development                                      | 263 | 1.28   | 31 | 2.214 | 0.00204  |

|                                                                           |      |         |     |       |         |
|---------------------------------------------------------------------------|------|---------|-----|-------|---------|
| GO:30500: regulation of bone mineralization                               | 9    | 0.0438  | 4   | 0.286 | 0.00205 |
| GO:6725: aromatic compound metabolism                                     | 146  | 0.71    | 20  | 1.429 | 0.00217 |
| GO:9064: glutamine family amino acid metabolism                           | 60   | 0.292   | 11  | 0.786 | 0.00219 |
| GO:6541: glutamine metabolism                                             | 21   | 0.102   | 6   | 0.429 | 0.0022  |
| GO:50878: regulation of body fluids                                       | 157  | 0.764   | 21  | 1.5   | 0.00229 |
| GO:6955: immune response                                                  | 1148 | 5.586   | 103 | 7.357 | 0.00235 |
| GO:16477: cell migration                                                  | 147  | 0.715   | 20  | 1.429 | 0.00235 |
| GO:30282: bone mineralization                                             | 15   | 0.073   | 5   | 0.357 | 0.00245 |
| GO:8209: androgen metabolism                                              | 5    | 0.0243  | 3   | 0.214 | 0.00284 |
| GO:19752: carboxylic acid metabolism                                      | 639  | 3.109   | 62  | 4.429 | 0.00311 |
| GO:6952: defense response                                                 | 1276 | 6.208   | 112 | 8     | 0.00315 |
| GO:1570: vasculogenesis                                                   | 10   | 0.0487  | 4   | 0.286 | 0.00323 |
| GO:6082: organic acid metabolism                                          | 641  | 3.119   | 62  | 4.429 | 0.00334 |
| GO:42730: fibrinolysis                                                    | 16   | 0.0778  | 5   | 0.357 | 0.00337 |
| GO:1508: regulation of action potential                                   | 16   | 0.0778  | 5   | 0.357 | 0.00337 |
| GO:50819: negative regulation of coagulation                              | 30   | 0.146   | 7   | 0.5   | 0.0034  |
| GO:50818: regulation of coagulation                                       | 30   | 0.146   | 7   | 0.5   | 0.0034  |
| GO:7165: signal transduction                                              | 4419 | 21.5    | 342 | 24.43 | 0.00351 |
| GO:6629: lipid metabolism                                                 | 870  | 4.233   | 80  | 5.714 | 0.00371 |
| GO:50776: regulation of immune response                                   | 94   | 0.457   | 14  | 1     | 0.00447 |
| GO:9084: glutamine family amino acid biosynthesis                         | 17   | 0.0827  | 5   | 0.357 | 0.00451 |
| GO:46578: regulation of Ras protein signal transduction                   | 17   | 0.0827  | 5   | 0.357 | 0.00451 |
| GO:7223: frizzled-2 signaling pathway                                     | 24   | 0.117   | 6   | 0.429 | 0.00458 |
| GO:6333: chromatin assembly or disassembly                                | 221  | 1.075   | 26  | 1.857 | 0.00459 |
| GO:7499: ectoderm and mesoderm interaction                                | 2    | 0.00973 | 2   | 0.143 | 0.00464 |
| GO:46716: muscle maintenance                                              | 2    | 0.00973 | 2   | 0.143 | 0.00464 |
| GO:9128: purine nucleoside monophosphate catabolism                       | 2    | 0.00973 | 2   | 0.143 | 0.00464 |
| GO:9169: purine ribonucleoside monophosphate catabolism                   | 2    | 0.00973 | 2   | 0.143 | 0.00464 |
| GO:6196: AMP catabolism                                                   | 2    | 0.00973 | 2   | 0.143 | 0.00464 |
| GO:9125: nucleoside monophosphate catabolism                              | 2    | 0.00973 | 2   | 0.143 | 0.00464 |
| GO:9158: ribonucleoside monophosphate catabolism                          | 2    | 0.00973 | 2   | 0.143 | 0.00464 |
| GO:6702: androgen biosynthesis                                            | 2    | 0.00973 | 2   | 0.143 | 0.00464 |
| GO:42448: progesterone metabolism                                         | 2    | 0.00973 | 2   | 0.143 | 0.00464 |
| GO:42271: susceptibility to natural killer cell mediated cytotoxicity     | 2    | 0.00973 | 2   | 0.143 | 0.00464 |
| GO:51495: positive regulation of cytoskeleton organization and biogenesis | 2    | 0.00973 | 2   | 0.143 | 0.00464 |
| GO:51496: positive regulation of stress fiber formation                   | 2    | 0.00973 | 2   | 0.143 | 0.00464 |
| GO:51492: regulation of stress fiber formation                            | 2    | 0.00973 | 2   | 0.143 | 0.00464 |
| GO:6907: pinocytosis                                                      | 2    | 0.00973 | 2   | 0.143 | 0.00464 |
| GO:46627: negative regulation of insulin receptor signaling pathway       | 2    | 0.00973 | 2   | 0.143 | 0.00464 |
| GO:9613: response to pest, pathogen or parasite                           | 726  | 3.532   | 68  | 4.857 | 0.00469 |
| GO:6520: amino acid metabolism                                            | 348  | 1.693   | 37  | 2.643 | 0.00482 |
| GO:6576: biogenic amine metabolism                                        | 67   | 0.326   | 11  | 0.786 | 0.00531 |
| GO:50766: positive regulation of phagocytosis                             | 6    | 0.0292  | 3   | 0.214 | 0.00539 |
| GO:50764: regulation of phagocytosis                                      | 6    | 0.0292  | 3   | 0.214 | 0.00539 |
| GO:43149: stress fiber formation                                          | 6    | 0.0292  | 3   | 0.214 | 0.00539 |
| GO:50777: negative regulation of immune response                          | 25   | 0.122   | 6   | 0.429 | 0.00569 |
| GO:51050: positive regulation of transport                                | 25   | 0.122   | 6   | 0.429 | 0.00569 |

|                                                                            |      |        |     |       |         |
|----------------------------------------------------------------------------|------|--------|-----|-------|---------|
| GO:8016: regulation of heart contraction rate                              | 41   | 0.199  | 8   | 0.571 | 0.00576 |
| GO:8207: C21-steroid hormone metabolism                                    | 18   | 0.0876 | 5   | 0.357 | 0.0059  |
| GO:8283: cell proliferation                                                | 810  | 3.941  | 74  | 5.286 | 0.00599 |
| GO:7166: cell surface receptor linked signal transduction                  | 1812 | 8.816  | 150 | 10.71 | 0.00642 |
| GO:9968: negative regulation of signal transduction                        | 98   | 0.477  | 14  | 1     | 0.0065  |
| GO:42127: regulation of cell proliferation                                 | 439  | 2.136  | 44  | 3.143 | 0.00662 |
| GO:43207: response to external biotic stimulus                             | 763  | 3.712  | 70  | 5     | 0.00672 |
| GO:7266: Rho protein signal transduction                                   | 79   | 0.384  | 12  | 0.857 | 0.00697 |
| GO:8366: nerve ensheathment                                                | 19   | 0.0924 | 5   | 0.357 | 0.00757 |
| GO:30195: negative regulation of blood coagulation                         | 19   | 0.0924 | 5   | 0.357 | 0.00757 |
| GO:30193: regulation of blood coagulation                                  | 19   | 0.0924 | 5   | 0.357 | 0.00757 |
| GO:42330: taxis                                                            | 177  | 0.861  | 21  | 1.5   | 0.00924 |
| GO:6935: chemotaxis                                                        | 177  | 0.861  | 21  | 1.5   | 0.00924 |
| GO:30182: neuron differentiation                                           | 166  | 0.808  | 20  | 1.429 | 0.00927 |
| GO:46580: negative regulation of Ras protein signal transduction           | 13   | 0.0633 | 4   | 0.286 | 0.00932 |
| GO:51058: negative regulation of small GTPase mediated signal transduction | 13   | 0.0633 | 4   | 0.286 | 0.00932 |
| GO:6584: catecholamine metabolism                                          | 20   | 0.0973 | 5   | 0.357 | 0.00953 |
| GO:44255: cellular lipid metabolism                                        | 687  | 3.343  | 63  | 4.5   | 0.00985 |



**Supplemental Table S2F**

**GO Biological Process Categories Overrepresented in HUVEC vs. hESC-EC**

| <b>GO Category</b>                                        | <b>Genes in Category</b> | <b>% of Genes in Category</b> | <b>Genes in List in Category</b> | <b>% of Genes in List in Category</b> | <b>P-Value</b> |
|-----------------------------------------------------------|--------------------------|-------------------------------|----------------------------------|---------------------------------------|----------------|
| GO:6468: protein amino acid phosphorylation               | 905                      | 4.403                         | 103                              | 7.984                                 | 2.57E-09       |
| GO:7154: cell communication                               | 5496                     | 26.74                         | 421                              | 32.64                                 | 7.24E-07       |
| GO:16310: phosphorylation                                 | 1069                     | 5.201                         | 106                              | 8.217                                 | 1.66E-06       |
| GO:6793: phosphorus metabolism                            | 1321                     | 6.427                         | 123                              | 9.535                                 | 5.72E-06       |
| GO:6796: phosphate metabolism                             | 1321                     | 6.427                         | 123                              | 9.535                                 | 5.72E-06       |
| GO:7599: hemostasis                                       | 140                      | 0.681                         | 24                               | 1.86                                  | 6.35E-06       |
| GO:7596: blood coagulation                                | 132                      | 0.642                         | 23                               | 1.783                                 | 7.44E-06       |
| GO:1525: angiogenesis                                     | 108                      | 0.525                         | 20                               | 1.55                                  | 1.13E-05       |
| GO:42060: wound healing                                   | 145                      | 0.705                         | 24                               | 1.86                                  | 1.18E-05       |
| GO:50878: regulation of body fluids                       | 157                      | 0.764                         | 25                               | 1.938                                 | 1.56E-05       |
| GO:50817: coagulation                                     | 139                      | 0.676                         | 23                               | 1.783                                 | 1.78E-05       |
| GO:48514: blood vessel morphogenesis                      | 113                      | 0.55                          | 20                               | 1.55                                  | 2.27E-05       |
| GO:1568: blood vessel development                         | 113                      | 0.55                          | 20                               | 1.55                                  | 2.27E-05       |
| GO:7165: signal transduction                              | 4419                     | 21.5                          | 337                              | 26.12                                 | 2.50E-05       |
| GO:1944: vasculature development                          | 115                      | 0.56                          | 20                               | 1.55                                  | 2.95E-05       |
| GO:7167: enzyme linked receptor protein signaling pathway | 310                      | 1.508                         | 38                               | 2.946                                 | 6.09E-05       |
| GO:9249: protein-lipoylation                              | 6                        | 0.0292                        | 4                                | 0.31                                  | 0.000209       |
| GO:46834: lipid phosphorylation                           | 6                        | 0.0292                        | 4                                | 0.31                                  | 0.000209       |
| GO:46854: phosphoinositide phosphorylation                | 6                        | 0.0292                        | 4                                | 0.31                                  | 0.000209       |
| GO:46928: regulation of neurotransmitter secretion        | 6                        | 0.0292                        | 4                                | 0.31                                  | 0.000209       |
| GO:7275: development                                      | 2960                     | 14.4                          | 230                              | 17.83                                 | 0.000241       |
| GO:50434: positive regulation of viral transcription      | 3                        | 0.0146                        | 3                                | 0.233                                 | 0.000247       |
| GO:43392: negative regulation of DNA binding              | 3                        | 0.0146                        | 3                                | 0.233                                 | 0.000247       |
| GO:30319: di-, tri-valent inorganic anion homeostasis     | 3                        | 0.0146                        | 3                                | 0.233                                 | 0.000247       |
| GO:51100: negative regulation of binding                  | 3                        | 0.0146                        | 3                                | 0.233                                 | 0.000247       |
| GO:7155: cell adhesion                                    | 1002                     | 4.875                         | 90                               | 6.977                                 | 0.000361       |
| GO:6880: intracellular sequestering of iron ion           | 7                        | 0.0341                        | 4                                | 0.31                                  | 0.000464       |
| GO:9653: morphogenesis                                    | 940                      | 4.574                         | 84                               | 6.512                                 | 0.000657       |
| GO:6516: glycoprotein catabolism                          | 25                       | 0.122                         | 7                                | 0.543                                 | 0.000666       |
| GO:50789: regulation of biological process                | 5781                     | 28.13                         | 414                              | 32.09                                 | 0.000676       |
| GO:50794: regulation of cellular process                  | 5371                     | 26.13                         | 386                              | 29.92                                 | 0.000875       |
| GO:51238: sequestering of metal ion                       | 8                        | 0.0389                        | 4                                | 0.31                                  | 0.000881       |
| GO:46782: regulation of viral transcription               | 4                        | 0.0195                        | 3                                | 0.233                                 | 0.000941       |
| GO:16584: nucleosome spacing                              | 4                        | 0.0195                        | 3                                | 0.233                                 | 0.000941       |
| GO:9299: mRNA transcription                               | 4                        | 0.0195                        | 3                                | 0.233                                 | 0.000941       |
| GO:19083: viral transcription                             | 4                        | 0.0195                        | 3                                | 0.233                                 | 0.000941       |
| GO:30002: anion homeostasis                               | 4                        | 0.0195                        | 3                                | 0.233                                 | 0.000941       |
| GO:19080: viral genome expression                         | 4                        | 0.0195                        | 3                                | 0.233                                 | 0.000941       |
| GO:9887: organ morphogenesis                              | 310                      | 1.508                         | 34                               | 2.636                                 | 0.00111        |
| GO:6826: iron ion transport                               | 52                       | 0.253                         | 10                               | 0.775                                 | 0.00129        |
| GO:50791: regulation of physiological process             | 5180                     | 25.2                          | 371                              | 28.76                                 | 0.00149        |

|                                                                                        |      |         |     |       |         |
|----------------------------------------------------------------------------------------|------|---------|-----|-------|---------|
| GO:18065: protein-cofactor linkage                                                     | 9    | 0.0438  | 4   | 0.31  | 0.00151 |
| GO:51244: regulation of cellular physiological process                                 | 5009 | 24.37   | 359 | 27.83 | 0.00176 |
| GO:6879: iron ion homeostasis                                                          | 38   | 0.185   | 8   | 0.62  | 0.00212 |
| GO:16477: cell migration                                                               | 147  | 0.715   | 19  | 1.473 | 0.00216 |
| GO:51101: regulation of DNA binding                                                    | 5    | 0.0243  | 3   | 0.233 | 0.00224 |
| GO:50906: detection of stimulus during sensory perception                              | 5    | 0.0243  | 3   | 0.233 | 0.00224 |
| GO:48524: positive regulation of viral life cycle                                      | 5    | 0.0243  | 3   | 0.233 | 0.00224 |
| GO:16197: endosome transport                                                           | 47   | 0.229   | 9   | 0.698 | 0.00229 |
| GO:7169: transmembrane receptor protein tyrosine kinase signaling pathway              | 228  | 1.109   | 26  | 2.016 | 0.00237 |
| GO:7595: lactation                                                                     | 10   | 0.0487  | 4   | 0.31  | 0.00239 |
| GO:1709: cell fate determination                                                       | 23   | 0.112   | 6   | 0.465 | 0.00242 |
| GO:6355: regulation of transcription, DNA-dependent                                    | 3150 | 15.33   | 234 | 18.14 | 0.00252 |
| GO:30334: regulation of cell migration                                                 | 31   | 0.151   | 7   | 0.543 | 0.00262 |
| GO:6351: transcription, DNA-dependent                                                  | 3244 | 15.78   | 240 | 18.6  | 0.00271 |
| GO:35315: hair cell differentiation                                                    | 2    | 0.00973 | 2   | 0.155 | 0.00394 |
| GO:42491: auditory receptor cell differentiation                                       | 2    | 0.00973 | 2   | 0.155 | 0.00394 |
| GO:9912: auditory receptor cell fate commitment                                        | 2    | 0.00973 | 2   | 0.155 | 0.00394 |
| GO:45602: negative regulation of endothelial cell differentiation                      | 2    | 0.00973 | 2   | 0.155 | 0.00394 |
| GO:16139: glycoside catabolism                                                         | 2    | 0.00973 | 2   | 0.155 | 0.00394 |
| GO:16142: O-glycoside catabolism                                                       | 2    | 0.00973 | 2   | 0.155 | 0.00394 |
| GO:16137: glycoside metabolism                                                         | 2    | 0.00973 | 2   | 0.155 | 0.00394 |
| GO:16140: O-glycoside metabolism                                                       | 2    | 0.00973 | 2   | 0.155 | 0.00394 |
| GO:9880: embryonic pattern specification                                               | 18   | 0.0876  | 5   | 0.388 | 0.00416 |
| GO:1569: patterning of blood vessels                                                   | 6    | 0.0292  | 3   | 0.233 | 0.00427 |
| GO:6895: Golgi to endosome transport                                                   | 12   | 0.0584  | 4   | 0.31  | 0.00509 |
| GO:30031: cell projection biogenesis                                                   | 19   | 0.0924  | 5   | 0.388 | 0.00536 |
| GO:7179: transforming growth factor beta receptor signaling pathway                    | 44   | 0.214   | 8   | 0.62  | 0.00552 |
| GO:6928: cell motility                                                                 | 356  | 1.732   | 35  | 2.713 | 0.00578 |
| GO:51674: localization of cell                                                         | 356  | 1.732   | 35  | 2.713 | 0.00578 |
| GO:40011: locomotion                                                                   | 356  | 1.732   | 35  | 2.713 | 0.00578 |
| GO:7032: endosome organization and biogenesis                                          | 54   | 0.263   | 9   | 0.698 | 0.00605 |
| GO:48513: organ development                                                            | 907  | 4.413   | 76  | 5.891 | 0.00608 |
| GO:7178: transmembrane receptor protein serine/threonine kinase signaling pathway      | 64   | 0.311   | 10  | 0.775 | 0.00625 |
| GO:30048: actin filament-based movement                                                | 20   | 0.0973  | 5   | 0.388 | 0.00678 |
| GO:8360: regulation of cell shape                                                      | 55   | 0.268   | 9   | 0.698 | 0.00684 |
| GO:48488: synaptic vesicle endocytosis                                                 | 7    | 0.0341  | 3   | 0.233 | 0.00713 |
| GO:45449: regulation of transcription                                                  | 3356 | 16.33   | 243 | 18.84 | 0.00729 |
| GO:7242: intracellular signaling cascade                                               | 1818 | 8.845   | 139 | 10.78 | 0.00788 |
| GO:45165: cell fate commitment                                                         | 29   | 0.141   | 6   | 0.465 | 0.00824 |
| GO:6350: transcription                                                                 | 3517 | 17.11   | 253 | 19.61 | 0.00838 |
| GO:30030: cell projection organization and biogenesis                                  | 21   | 0.102   | 5   | 0.388 | 0.00845 |
| GO:51270: regulation of cell motility                                                  | 38   | 0.185   | 7   | 0.543 | 0.00858 |
| GO:40012: regulation of locomotion                                                     | 38   | 0.185   | 7   | 0.543 | 0.00858 |
| GO:50795: regulation of behavior                                                       | 38   | 0.185   | 7   | 0.543 | 0.00858 |
| GO:19219: regulation of nucleobase, nucleoside, nucleotide and nucleic acid metabolism | 3417 | 16.63   | 246 | 19.07 | 0.00904 |
| GO:46916: transition metal ion homeostasis                                             | 48   | 0.234   | 8   | 0.62  | 0.00942 |

|                              |     |       |    |       |         |
|------------------------------|-----|-------|----|-------|---------|
| GO:7626: locomotory behavior | 369 | 1.795 | 35 | 2.713 | 0.00988 |
|------------------------------|-----|-------|----|-------|---------|
